# Supplementary material for: Virion-incorporated CD14 enables HIV-1 to bind LPS and initiate TLR4 signaling in immune cells
Source: PubMed Central journal article supplement (PMC11092368; doi:10.1128/jvi.00363-24), 2024-04-25

# A: FCMPASS output report for the acquisition parameters of samples, and fluorescence and light scatter calibration.

## Flow Cytometer Modeling Settings

FCMPASS Version 4.2

| SSC Parameter          | Wavelength | Sheath RI | Determine HA | Aperture Geom | Theta | Phi | Eps  | Cali. Factor (nm <sup>2</sup> ) |
|------------------------|------------|-----------|--------------|---------------|-------|-----|------|---------------------------------|
| SSC_1-H   Violet SSC-H | 405        | 1.3430917 | on           | circle        | 90    | 90  | 54.7 | 0.004105378                     |

## Light Scatter Calibration Reference Beads

| Diameter (nm) | Diameter CV (%) | Measured RI | Measurement Wavelength | Composition | Acquired Stat | Acquired CV | Input  | Acquisition Wavelength | Modelled RI | Manufacturer            | Catalogue No. | Lot No. |
|---------------|-----------------|-------------|------------------------|-------------|---------------|-------------|--------|------------------------|-------------|-------------------------|---------------|---------|
| 81            | 11.7            | 1.59        | 589                    | Polystyrene | 6435          | 11.7        | Manual | 405                    | 1.625265271 | ThermoFisher Scientific | 3080A         | 228748  |
| 100           | 7.8             | 1.59        | 589                    | Polystyrene | 20889         | 7.8         | Manual | 405                    | 1.625265271 |                         | 3100A         | 204935  |
| 152           | 3.3             | 1.59        | 589                    | Polystyrene | 138043        | 3.3         | Manual | 405                    | 1.625265271 |                         | 3150A         | 202026  |
| 203           | 2.6             | 1.59        | 589                    | Polystyrene | 394220        | 2.6         | Manual | 405                    | 1.625265271 |                         | 3200A         | 205131  |
| 269           | 1.6             | 1.59        | 589                    | Polystyrene | 912000        | 1.6         | Manual | 405                    | 1.625265271 |                         | 3269          | 202729  |
| 303           | 1.6             | 1.59        | 589                    | Polystyrene | 1160000       | 1.6         | Manual | 405                    | 1.625265271 |                         | 3300A         | 204665  |
| 345           | 1.9             | 1.59        | 589                    | Polystyrene | 1380000       | 1.9         | Manual | 405                    | 1.625265271 |                         | 3350A         | 199283  |
| 401           | 1.3             | 1.59        | 589                    | Polystyrene | 1520000       | 1.3         | Manual | 405                    | 1.625265271 |                         | 3400A         | 203859  |
| 453           | 1.7             | 1.59        | 589                    | Polystyrene | 1800000       | 1.7         | Manual | 405                    | 1.625265271 |                         | 3450A         | 204047  |
| 480           | 4.2             | 1.45        | 589                    | Silica      | 258839        | 4.2         | Manual | 405                    | 1.46110339  |                         | 8050          | 203277  |
| 730           | 4.1             | 1.45        | 589                    | Silica      | 1040000       | 4.1         | Manual | 405                    | 1.46110339  | 8070                    | 207434        |         |

## Fluorescence Calibration

| Parameter    | New Parameter Name | Reference Fluor | Reference Value 1 | Reference Value 2 | Reference Value 3 | Acquired Value 1 | Acquired Value 2 | Acquired Value 3 | F/P Ratio | Slope      | Intercept   | R-Square    | Regression Type | Manufacturer      | Cat. No. | Lot No. |
|--------------|--------------------|-----------------|-------------------|-------------------|-------------------|------------------|------------------|------------------|-----------|------------|-------------|-------------|-----------------|-------------------|----------|---------|
| FL9-A   PE-A | PE MESF            | PE              | 474               | 5359              | 23843             | 73309            | 896000           | 3870000          | 1         | 1.01423414 | 2.156492534 | 0.999812322 | weighted log    | Beckton Dickinson | 340495   | 47973   |

## Sample Acquisition Information

The following extrapolations of thresholds to standard units assume that samples were acquired at the same detector settings as their calibration controls.

| Filename              | Sample Type             | Trigger Parameter | Trigger ID | Trigger Threshold (au) | Detector Setting (au) | Trigger Threshold   Polystyrene (nm) | Trigger Threshold   Silica (nm) | Trigger Threshold   EV Diameter (nm) [High RI] | Trigger Threshold   EV Diameter (nm) [Average RI] | Trigger Threshold   EV Diameter (nm) [Low RI] | Trigger Threshold   rEV CS Diameter (nm) | Trigger Threshold   Scattering CS (nm <sup>2</sup> ) |
|-----------------------|-------------------------|-------------------|------------|------------------------|-----------------------|--------------------------------------|---------------------------------|------------------------------------------------|---------------------------------------------------|-----------------------------------------------|------------------------------------------|------------------------------------------------------|
| All files used herein | Samples and Calibrators | Violet SSC        | SSC_1-H    | 2000                   | 200                   | 65.5                                 | 89.6                            | 103.6                                          | 114.9                                             | 137.7                                         | 98.2                                     | 8.2                                                  |

## References

- Welsh, J.A., Horak, P., Wilkinson, J.S., Ford, V.J., Jones, J.C., Smith, D., Holloway, J.A. and Englyst, N.A. (2019), FCMPASS Software Aids Extracellular Vesicle Light Scatter Standardization. *Cytometry*. doi:10.1002/cyto.a.23782
- Welsh, J.A., Jones, J.C. and Tang, V.A. (2020), Fluorescence and Light Scatter Calibration Allow Comparisons of Small Particle Data in Standard Units across Different Flow Cytometry Platforms and Detector Settings. *Cytometry*. doi:10.1002/cyto.a.24029
- Welsh, J. A., & Jones, J. C. (2020). Small particle fluorescence and light scatter calibration using FCMPASS software. *Current Protocols in Cytometry*, 94, e79. doi: 10.1002/cpcy.79

**B: Exported FCM<sub>PASS</sub> plots for light scatter and fluorescence calibration.**

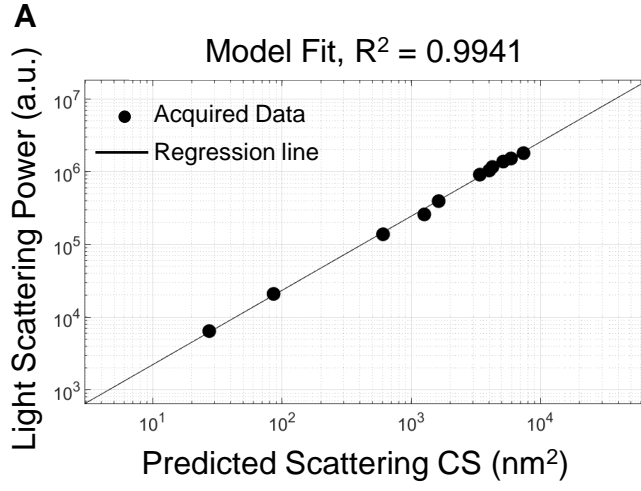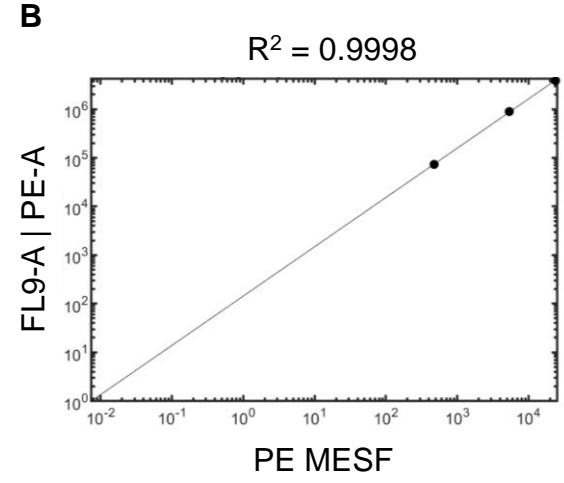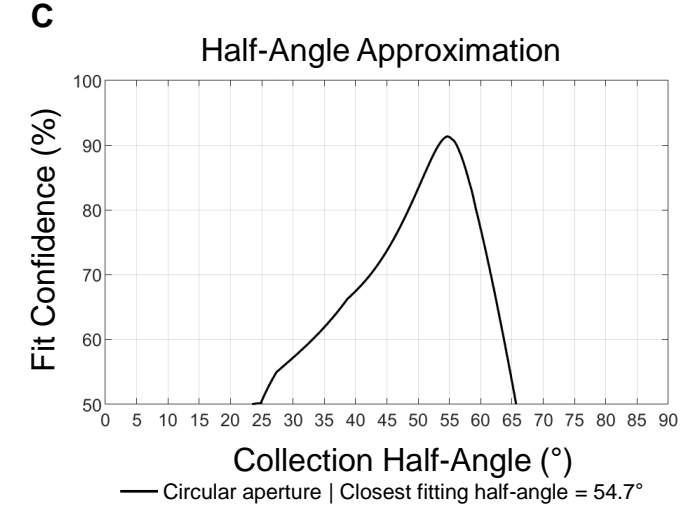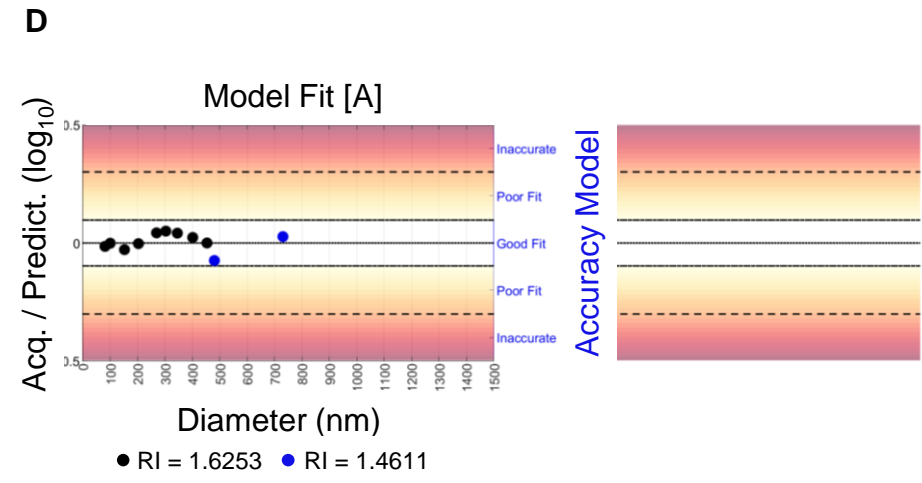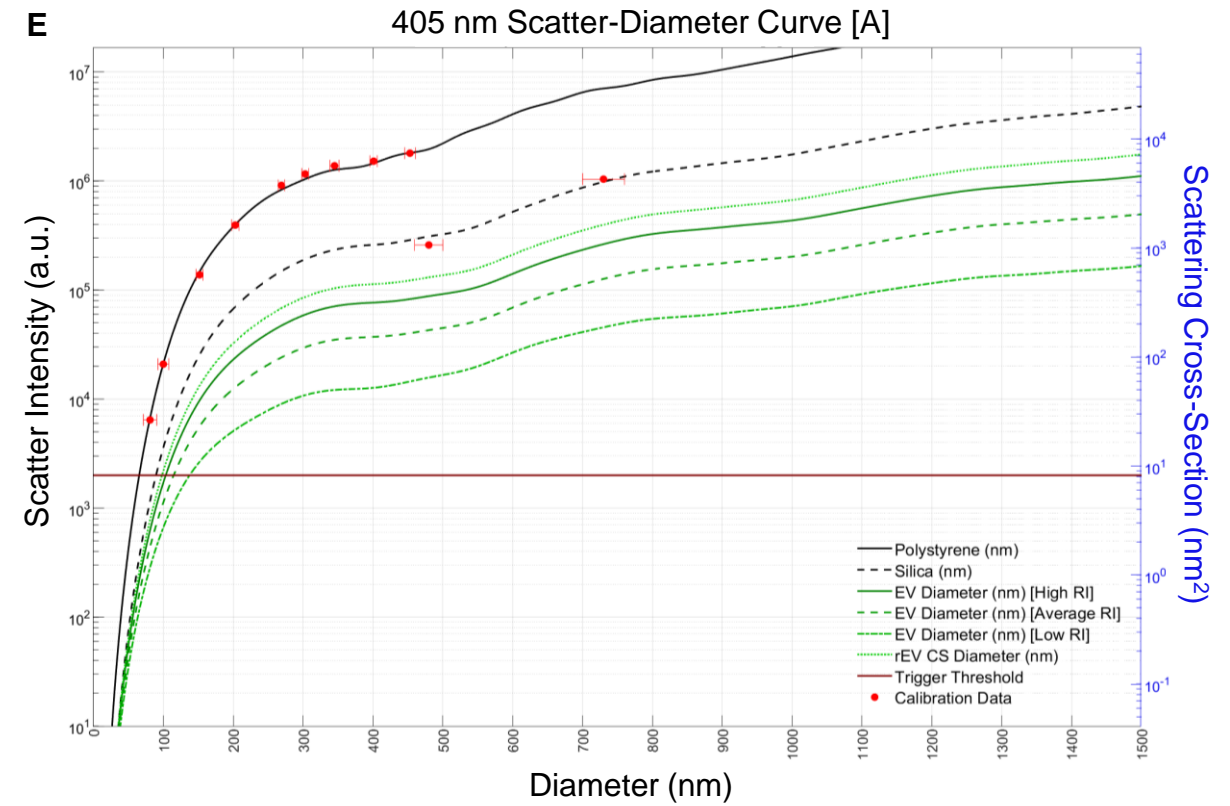

Supplement: jvi.00363-24-s0002.pdf [file jvi.00363-24-s0002.pdf]
