# Supplementary material for: Virion-incorporated CD14 enables HIV-1 to bind LPS and initiate TLR4 signaling in immune cells
Source: PubMed Central journal article supplement (PMC11092368; doi:10.1128/jvi.00363-24), 2024-04-25
Supplement: jvi.00363-24-s0001.pdf [file jvi.00363-24-s0001.pdf]

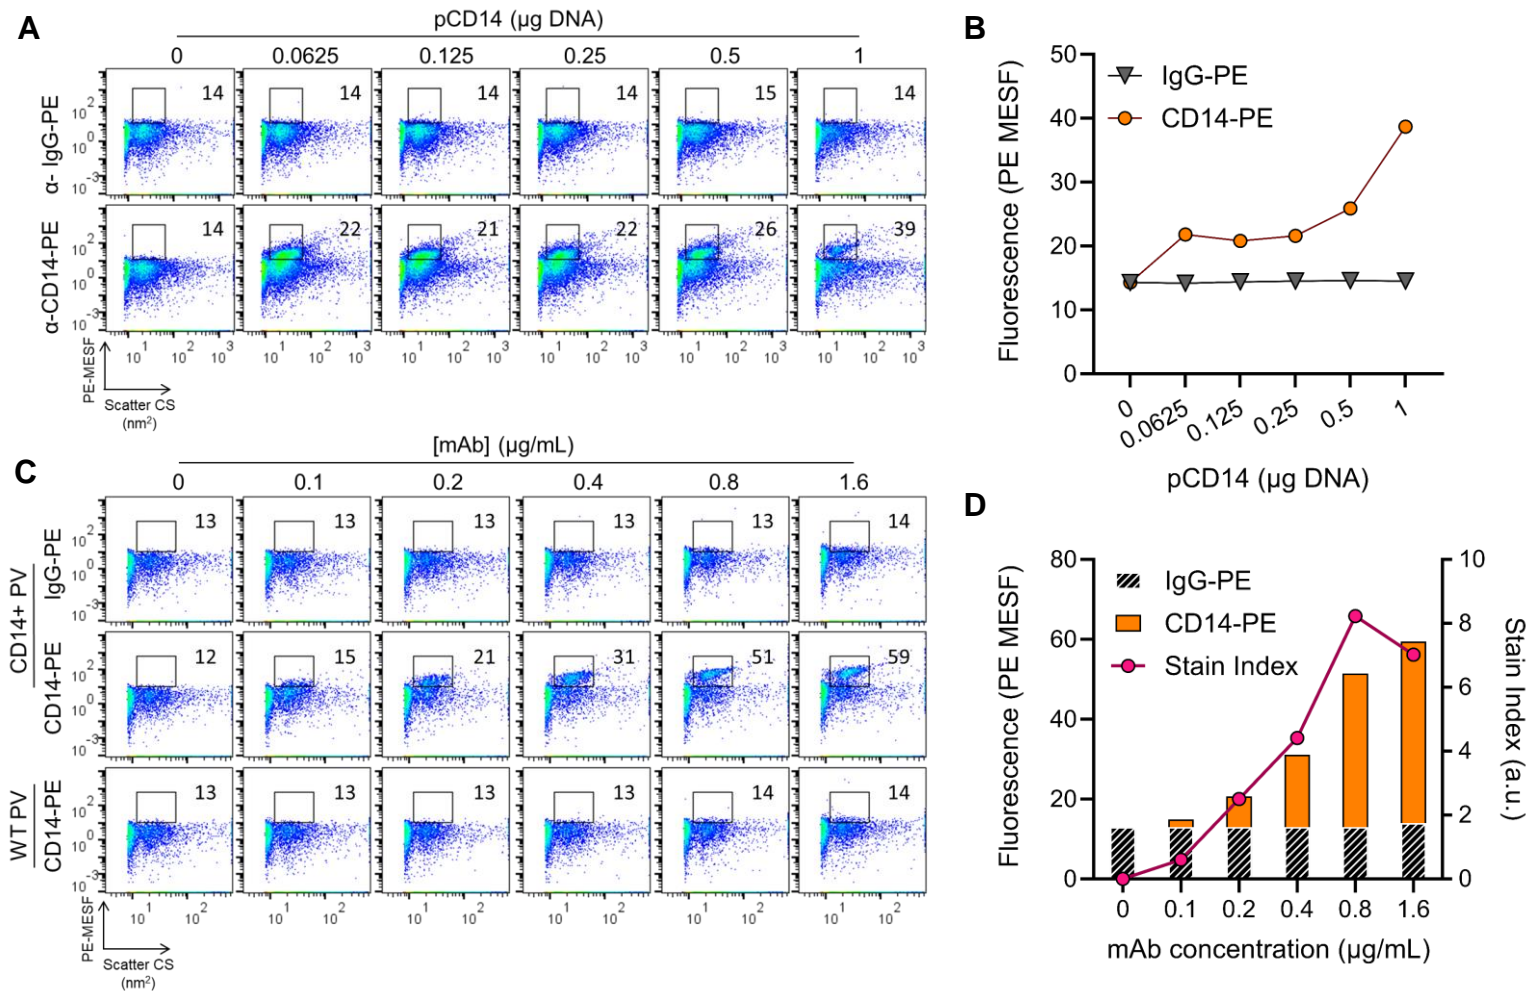

**Fig S1. Optimizing the production and staining of HIV-1 pseudovirus models for CD14 incorporation.** (A) Varying amounts of CD14 plasmid DNA (pCD14) were co-transfected with the HIV-1 backbone (pSG3 $\Delta$ Env) to produce virions with differing amounts of CD14 on the surface. Virions were then stained with PE-conjugated isotype control (top row) or anti-CD14 mAb M5E2 (bottom row) before FVM analysis. Gates demarcate PE<sup>+</sup> events set relative to the isotype control. PE MESH values are enumerated for PE<sup>+</sup> events. Data is representative of two independent transfections. (B) PE MESH values from (A) were plotted over the range of pCD14 tested for isotype control (IgG-PE, grey inverted triangle) and anti-CD14 (CD14-PE, orange circles) stains. (C) Titrating mAbs by FVM. PE-conjugated anti-CD14 mAb M5E2 (bottom two rows) or isotype control (top row) were titrated on CD14<sup>+</sup> (top two rows) and WT virions (bottom row). Gates are the PE<sup>+</sup> events and the associated PE MESH values are enumerated on each plot. Data are representative of two different titrations done using two different virus stocks. WT and CD14<sup>+</sup> virus stocks shown in FVM plots had a respective titer of 224 and 132 ng/mL p24 as measured by ELISA. (D) PE MESH (left Y-axis) values for isotype control (IgG-PE, hatched bars) and anti-CD14 (CD14-PE, orange bars) stains from CD14<sup>+</sup> PVs in (C) were plotted over the range of antibody concentrations tested. Stain index (magenta, right Y-axis) was calculated using IgG-PE and CD14-PE MESH values to identify optimal mAb concentration.

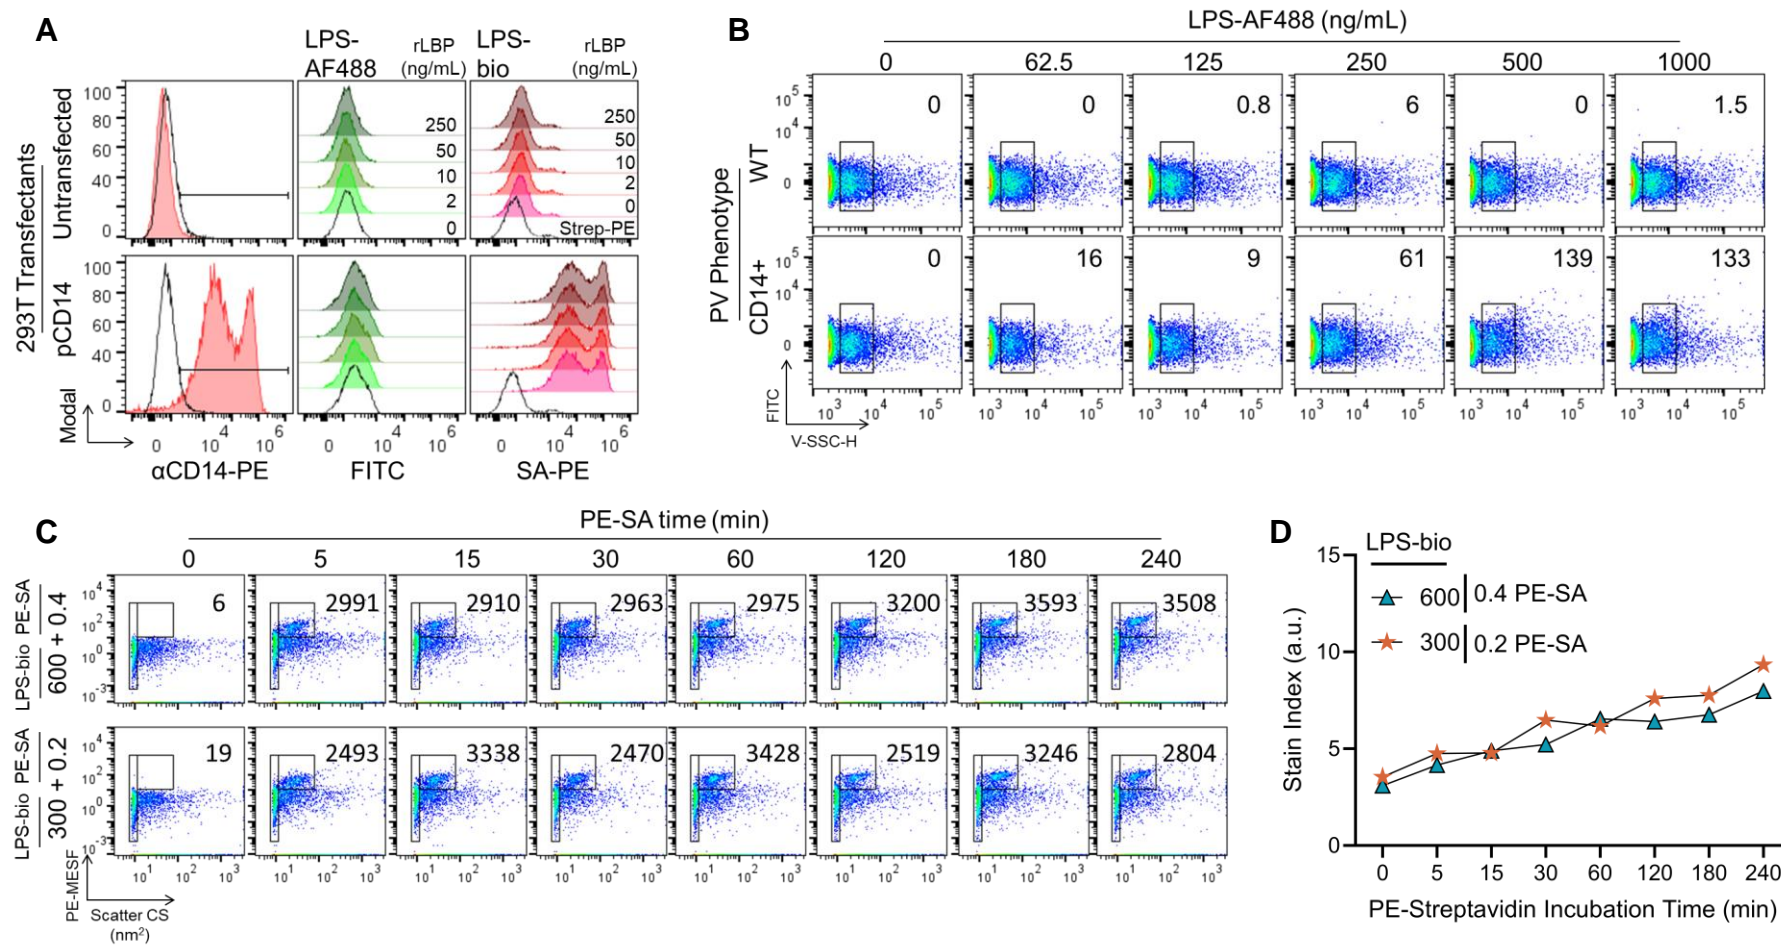

**Fig S2. LPS-bio and PE-SA offers a highly sensitive approach for detecting LPS binding to virions.** (A) Validating the binding of LPS-AF488 (middle column) and LPS-bio (right column) to CD14-transfected (bottom row) and untransfected (top row) 293T cells by flow cytometry, under different recombinant LBP concentrations (0-250 ng/mL). Cells were stained with PE-conjugated anti-CD14 (mAb M5E2, pink histograms) or isotype control (black histograms) to confirm CD14 expression (left column). LPS-bio was detected with PE-conjugated streptavidin (SA-PE). (B) FVM was used to evaluate the binding of LPS-AF488 (0-1000 ng/mL) to WT (top row) and CD14<sup>+</sup> virions (bottom row). Gates were drawn to include the entire virion population to better average the fluorescence intensity, since staining was less profound than seen for mAbs and LPS-bio (C). Mean fluorescence intensities (FITC) of the gated populations are enumerated. Data is representative of two independent virus stocks. (C) FVM was used to evaluate the binding of LPS-bio to CD14<sup>+</sup> virions over a range of incubation times with PE-SA (0-240 min). Two pairs of LPS-bio (ng/mL) and PE-SA (μg/mL) concentrations were tested (top vs bottom rows). Left gates indicate optical noise used in (D) and right gates define PE<sup>+</sup> events with enumerated particle counts values. WT and CD14<sup>+</sup> virus stocks shown in FVM plots of B-C had a respective titer of 45 and 73 ng/mL p24 as measured by ELISA. (D) Stain index calculations using the PE MESF of PE<sup>+</sup> particles in (C) were plotted over the PE-SA incubation times for each pair of concentration (blue triangles vs orange stars). LPS-bio and PE-SA are in units of ng/mL and μg/mL, respectively.

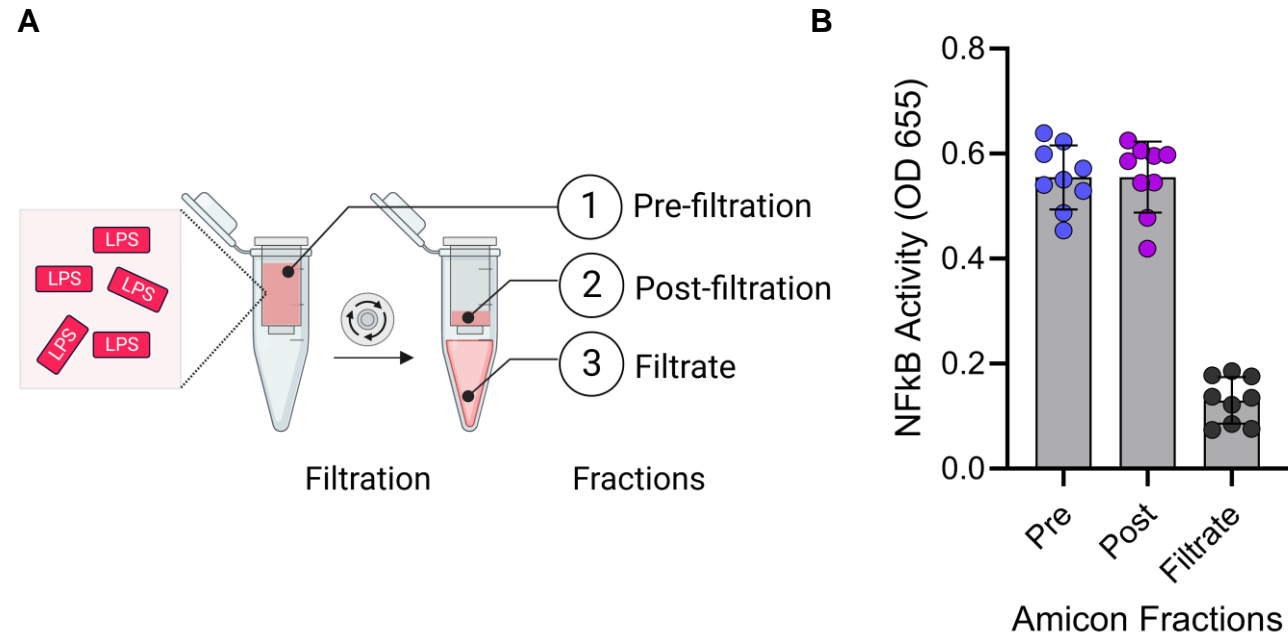

**Fig S3. Determining the feasibility of size exclusion filtration on LPS.** (A) Schematic depicting the sample preparation. LPS was diluted and added to an Amicon column (100 kDa MWCO) for size exclusion filtration. Fractions were collected before filtration ('Pre-filtration') and after filtration ('Post-filtration'), in addition to the flow-through ('Filtrate'). (B) Fractions collected in (A) were added to THP1-Dual cells and NF- $\kappa$ B activation was measured by SEAP enzymatic activity in supernatants. Data are mean  $\pm$  SD of n=9 column filtrations.

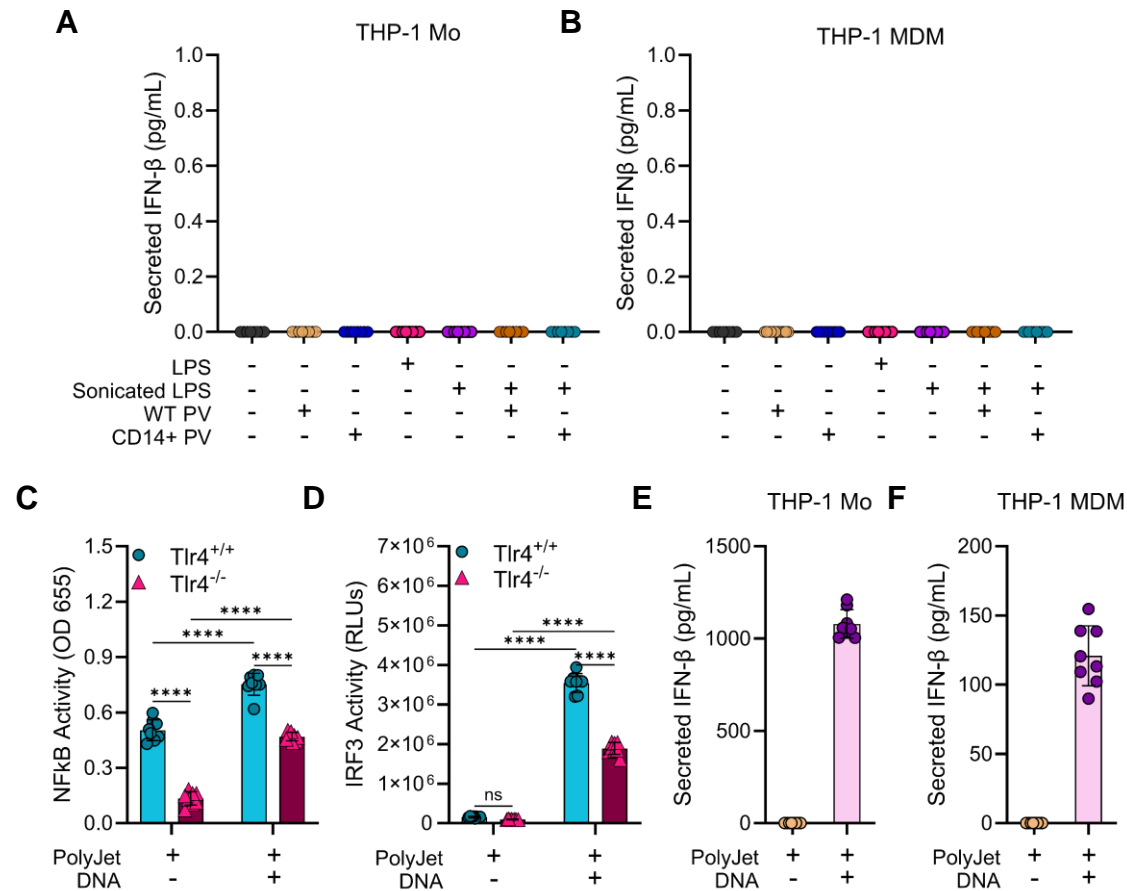

**Fig S4. Determination of IFN- $\beta$  response in THP-1 and PMA-differentiated THP-1.** (A) Experiments were designed as in Figures 5-6. Secreted interferon-beta (IFN- $\beta$ ) was measured by ELISA from stimulated (24h) THP-1 monocyte (THP-1 Mo) supernatants. Data are mean  $\pm$  SD of 2-3 independent experiments done using four different virus stocks each time. (B) As in (A) using monocyte-derived macrophages generated by PMA differentiation of THP-1 (THP-1 MDM). (C) NF- $\kappa$ B was proxied by measuring SEAP activity from TLR4-expressing (teal circles, Tlr4<sup>+/+</sup>) or TLR4-KO (magenta triangles, Tlr4<sup>-/-</sup>) THP1-Dual cells induced after 24h stimulation with transfected DNA or transfection reagent alone (Poly Jet). (D) IRF3 activation was measured by luciferase activity under the same conditions as in (C). For C-D, data are mean  $\pm$  SD of two independent experiments done using four different virus stocks each time. Statistical significance was evaluated with two-way ANOVA ( $\alpha = 0.05$ ) and Tukey's correction for multiple comparisons. n=8; ns, non-significant; \*\*\*\* p<0.0001. Secretion of IFN- $\beta$  by THP-1 Mo (E) and THP-1 MDM (F) after 24h stimulation with transfected DNA or transfection reagent alone (Poly Jet). Data are mean  $\pm$  SD of four different virus stocks across two independent experiments.

## SUPPORTING INFORMATION

**Fig. S1.** Optimizing the production and staining of HIV-1 pseudovirus models for CD14 incorporation.

**Fig. S2.** LPS-bio and PE-SA offers a highly sensitive approach for detecting LPS binding to virions.

**Fig. S3.** Determining the feasibility of size exclusion filtration on LPS.

**Fig. S4.** Determination of IFN- $\beta$  response in THP-1 and PMA-differentiated THP-1.

**Table S1.** (A) FCM<sub>PASS</sub> output report for the acquisition parameters of samples, and fluorescence and light scatter calibration.

(B) Exported FCM<sub>PASS</sub> plots for light scatter and fluorescence calibration.

**Table S2.** MIFlowCyt-EV checklist in compliance with the MIFlowCyt-EV framework for standardized reporting of nanoscale cytometry.
